# Supplementary material for: Methyl red based metal–organic frameworks for the selective and tuneable sensing of ammonia gas
Source: Royal Society of Chemistry journal article supplement (doi:10.1039/d3tc03120a), 2023-11-16
Supplement: d3tc03120a1.pdf [file d3tc03120a1.pdf]

*Electronic Supporting Information for:*

## **Methyl Red Based Metal-Organic Frameworks for the Selective and Tunable Sensing of Ammonia Gas.**

Craig N. G. Weir,<sup>a</sup> Rodney J. Blanchard,<sup>a</sup> Amanda P. Parsons,<sup>a</sup> Gauthaman Kalarikkandy,<sup>a</sup>  
Michael J. Katz<sup>a,†</sup>

a. Department of Chemistry, Memorial University of Newfoundland, St. John's, Newfoundland and Labrador, Canada A1B 3X7

† Corresponding author e-mail: mkatz@mun.ca.

|                                                              |    |
|--------------------------------------------------------------|----|
| 1. <sup>1</sup> H NMR Spectroscopy .....                     | S2 |
| 2. Gas Adsorption Isotherms.....                             | S3 |
| 3. Infrared Spectroscopy .....                               | S4 |
| 4. <sup>13</sup> C Magic Angle Spinning Solid-State NMR..... | S5 |

# 1. $^1\text{H}$ NMR Spectroscopy

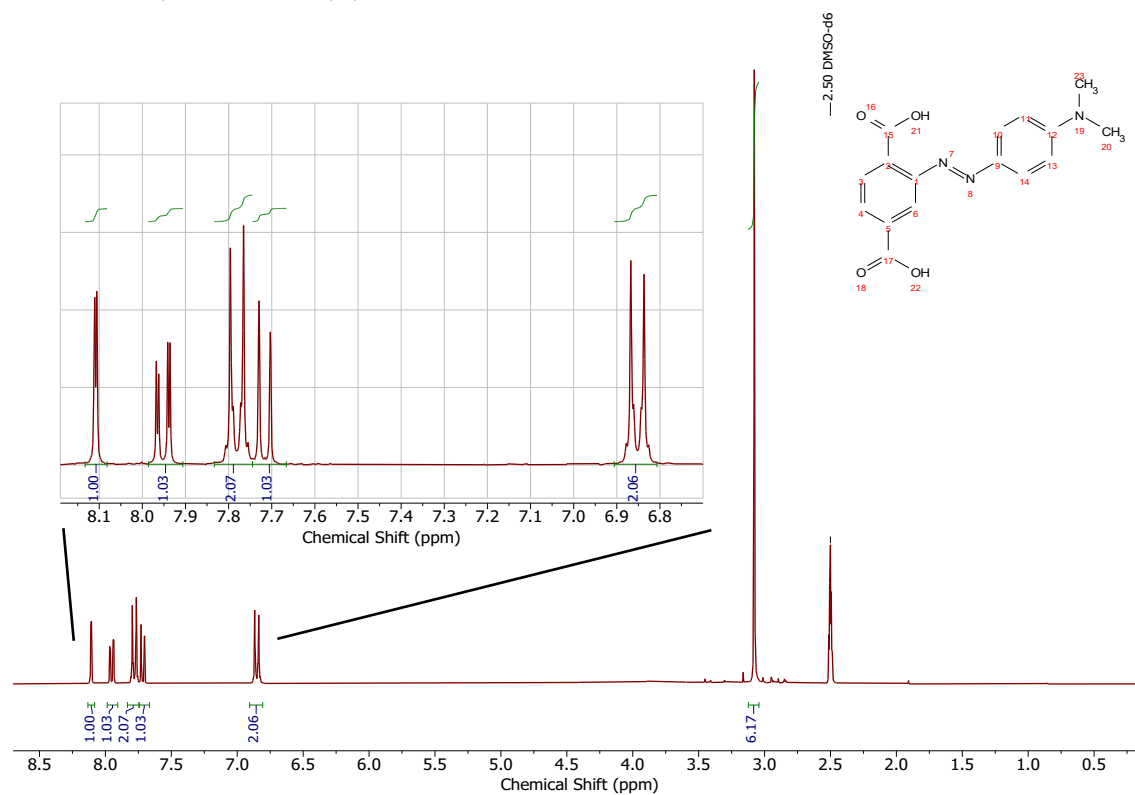

Fig. S1:  $^1\text{H}$  NMR of 2-[2-[4-(Dimethylamino)phenyl]diazenyl]-1,4-benzenedicarboxylic acid (H<sub>2</sub>MRL) measured in DMSO-*d*<sub>6</sub> on a Bruker AVANCE 500 MHz spectrometer.

## 2. Gas Adsorption Isotherms

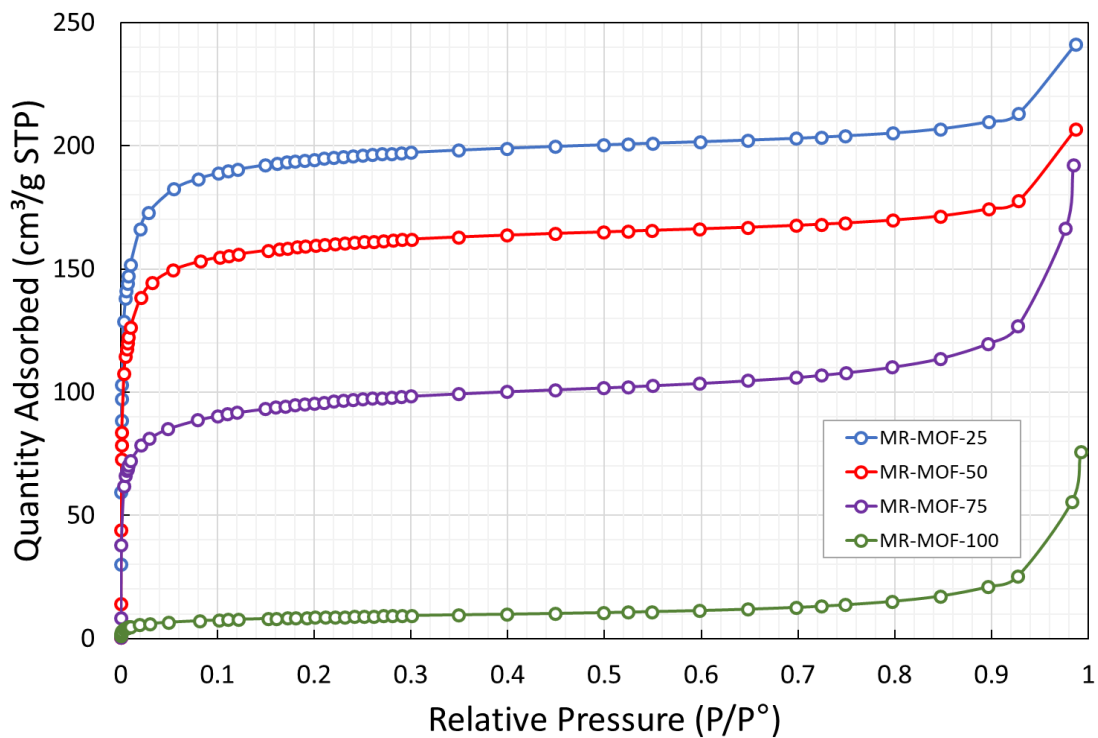

Fig. S2: Nitrogen gas adsorption isotherms measured at 77 K for MR-MOF after 5 adsorption/desorption cycles of ammonia vapour. Sufficient ammonia vapour was utilized to convert all the MOFs from the parent red colour to the yellow colour. Especially for MR-MOF-100, this represented a large amount of ammonia vapour.

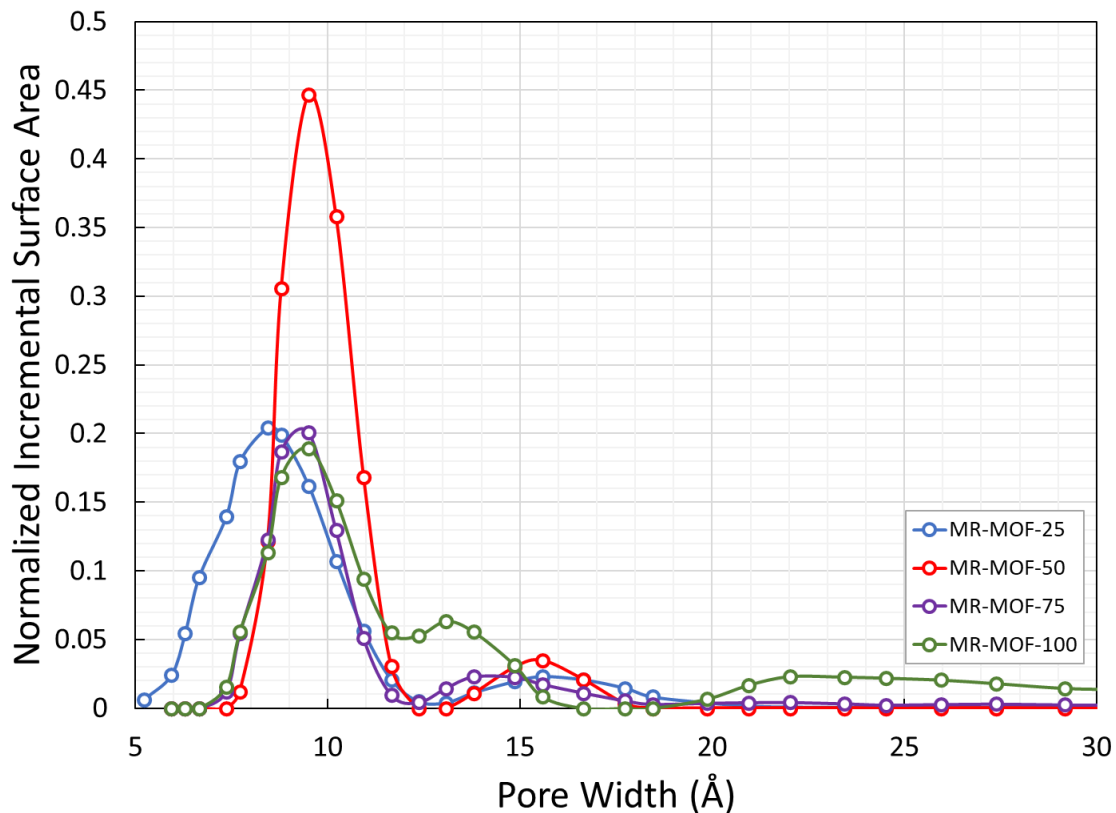

Fig. S3: BET surface area normalized pore size distributions for MR-MOF after 5 adsorption/desorption cycles of ammonia vapour. Pore size distribution was determined using the Tarazona NLDFT ( $E_{\text{sf}} = 30.0\text{K}$ ) model. The standard deviations for the fits are 2.87350 (MR-MOF-25), 2.62504 (MR-MOF-50), 1.30490 (MR-MOF-75), and 0.05079  $\text{cm}^3/\text{g}$  (MR-MOF-100).

### 3. Infrared Spectroscopy

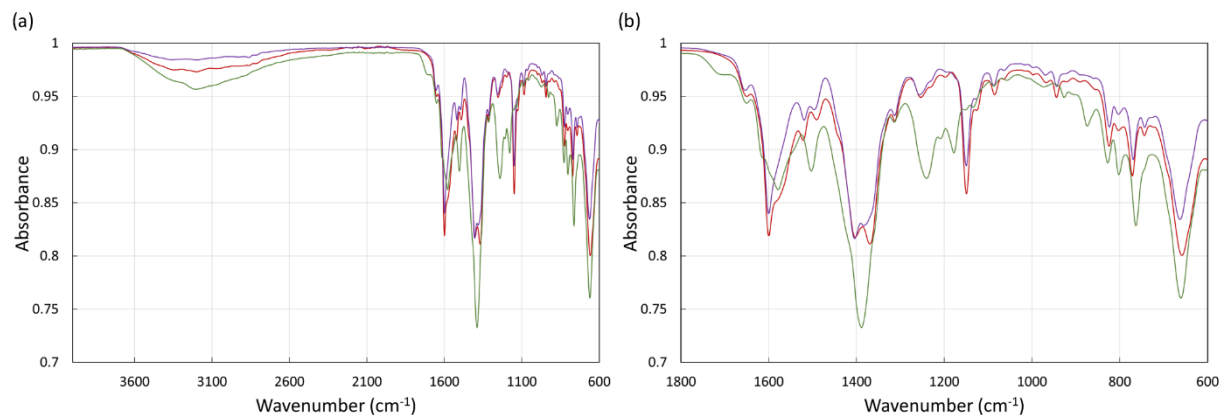

Fig. S4: Full (a) and zoom-in (b) IR spectroscopy of as-synthesized MR-MOF-100 (purple), MR-MOF-100 after hydrochloric acid vapor exposure (green), MR-MOF-100 after ammonia vapor exposure (red).

## 4. $^{13}\text{C}$ Magic Angle Spinning Solid-State NMR

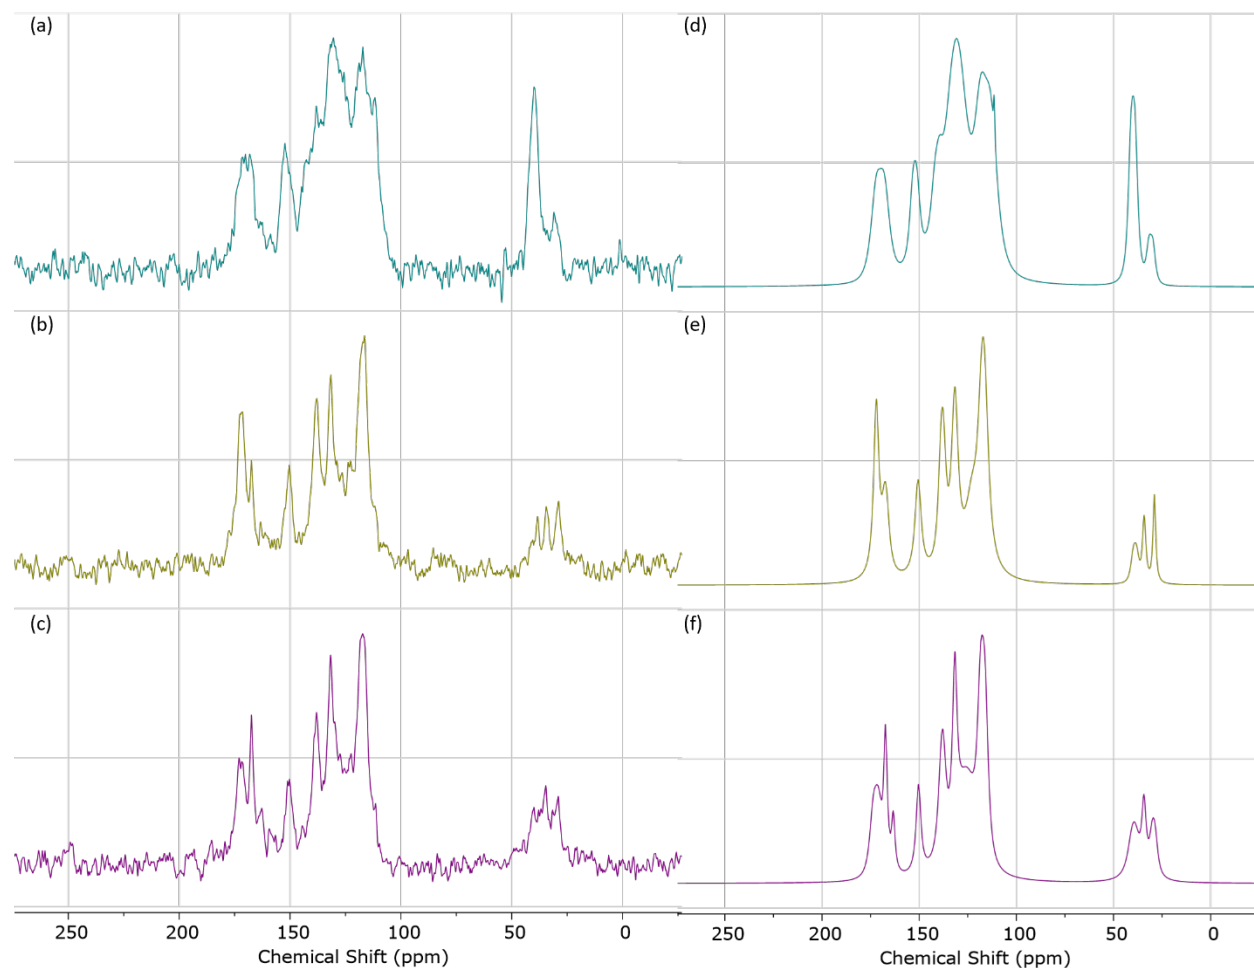

Fig. S5:  $^{13}\text{C}$  Magic Angle Spinning Solid-State NMR (151 MHz) of (a) MR-MOF-100 post five cycles of ammonia exposure, (b) MR-MOF-100 post hydrochloric acid exposure, (c) MR-MOF-100, and the respective deconvoluted spectrum (d:  $\delta$  30.75, 39.95, 111.37, 115.67, 130.88, 140.78, 152.24, 170.03 ppm), (e:  $\delta$  28.98, 34.22, 39.01, 117.01, 122.83, 131.66, 138.14, 150.57, 167.31, 172.07 ppm), and (f:  $\delta$  29.35, 34.34, 39.62, 117.26, 125.65, 131.68, 138.09, 150.35, 163.34, 167.34, 172.28 ppm). The integrated intensities of the deconvoluted resonance in the methyl region (25-50 ppm) to the remaining resonances is 2.46:14 for MR-MOF-100 (c/f), 1.32:14 for acid-exposed MR-MOF-100, and 2:14 for ammonia-exposed MR-MOF-100; these values are consistent with one another given the level of noise in the spectra.
